# Supplementary material for: OsGLP participates in the regulation of lignin synthesis and deposition in rice against copper and cadmium toxicity
Source: PubMed Central journal article supplement (PMC9878301; doi:10.3389/fpls.2022.1078113), 2023-01-12
Supplement: DataSheet_1.pdf [file DataSheet_1.pdf]

*Supplementary Materials*

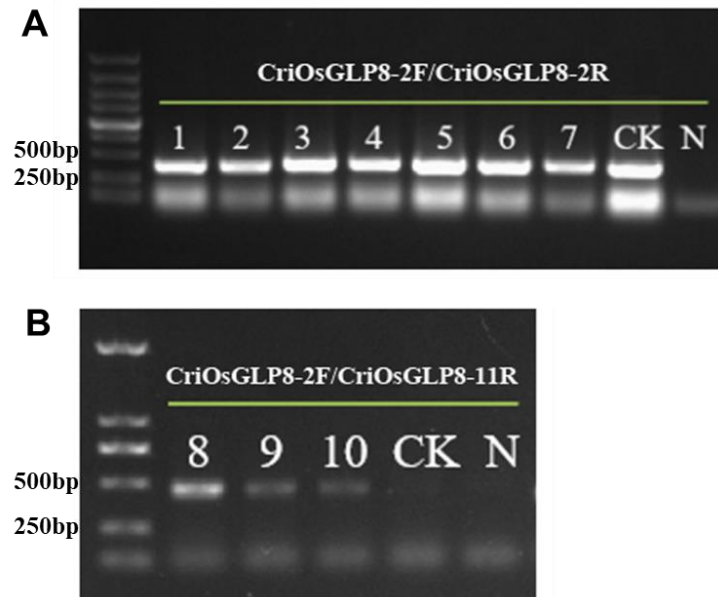

**FIGURE S1** | Construction of transgenic rice lines. **(A)** Validation of *osglp8-2* mutant and **(B)** Validation of *osglp8-(2-11)* mutant. CK means control check, N means negative control.

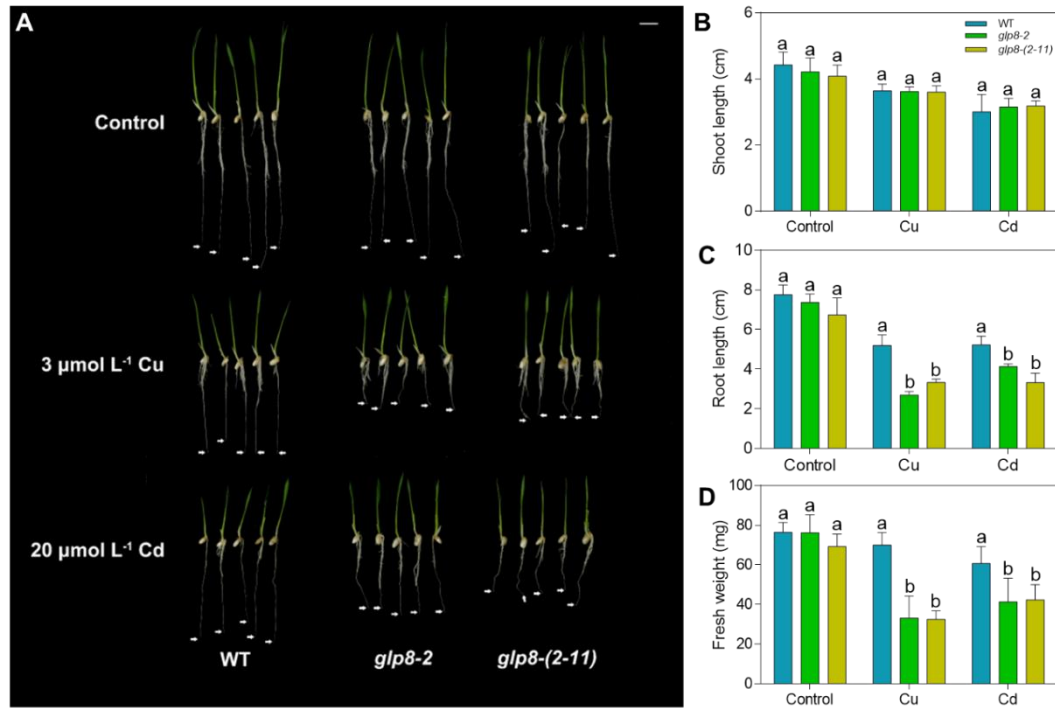

**FIGURE S2** | Knockout of *OsGLPs* results in the growth inhibition of rice seedlings. **(A)** Phenotypes of 4-day-old WT and transgenic seedlings grown for 3 days under normal conditions, 3  $\mu\text{mol L}^{-1}$   $\text{CuSO}_4$  treatment, or 20  $\mu\text{mol L}^{-1}$   $\text{CdCl}_2$  treatment. Scale bar = 1 cm. **(B and C)** Root elongation of WT (wild type) and transgenic plants. **(D)** Fresh weight of WT and transgenic plants. Values are the mean  $\pm$  SD;  $n = 3$ . Different letters indicate a difference of  $p \leq 0.05$  by the LSD test.

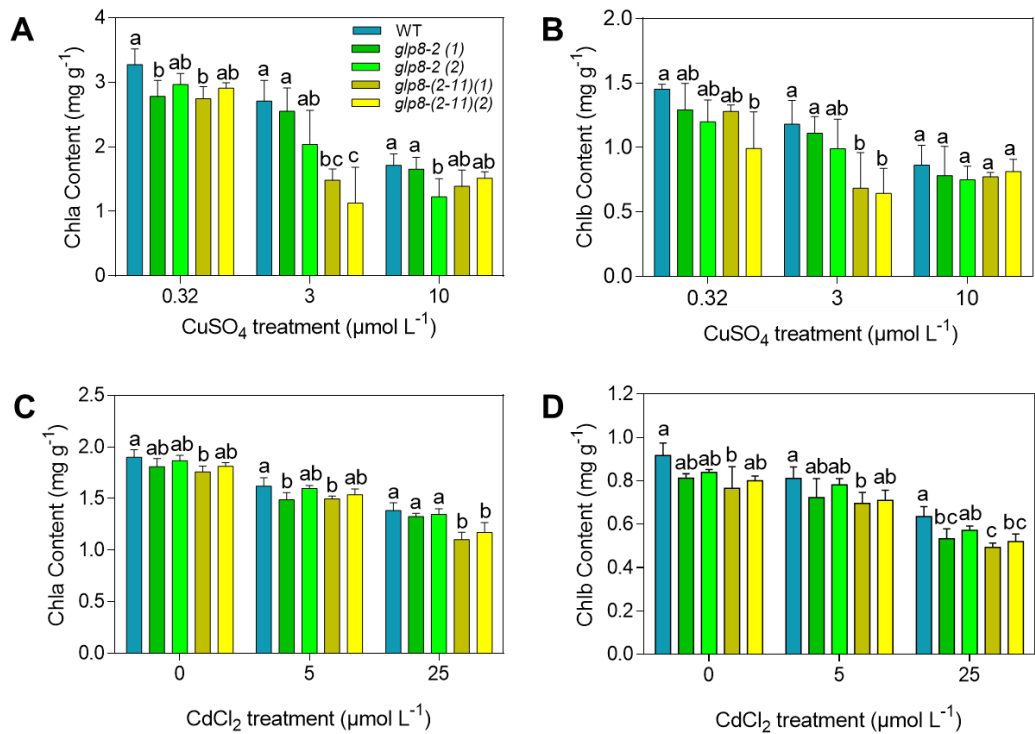

**FIGURE S3** | Knockout of OsGLPs affects chlorophyll content in rice. **(A and B)** The Chla and Chlb content in the roots and shoots of two-week-old seedlings treated with 3 or 10 μmol L<sup>-1</sup> CuSO<sub>4</sub>. **(C and D)** The Chla and Chlb content in the roots and shoots of two-week-old seedlings treated with 5 or 25 μmol L<sup>-1</sup> CdCl<sub>2</sub> for 5 days. Values are the mean ± SD; n = 3. Different letters indicate a difference of  $p \leq 0.05$  by the LSD test.

**TABLE S1** | Primers used for plasmid construction.

| Primer name   | Primer sequence (5'-3')                     |
|---------------|---------------------------------------------|
| gRNA1-F       | GGCATAGCCCTCTCCAAGACTTTT                    |
| gRNA1-R       | AAACAAAAGTCTTGGAGAGGGCTA                    |
| gRNA2-F       | GGCATCCTGCTCCTCGCCACTCTT                    |
| gRNA2-R       | AAACAAGAGTGGCGAGGAGCAGGA                    |
| CriOsGLP8-2F  | CATCTCAAACACACCACCTGA                       |
| CriOsGLP8-2R  | AAGACATTGACCAAAGTGA                         |
| CriOsGLP8-11F | CATCTCAAACACACCACCTGA                       |
| CriOsGLP8-11R | TTGCTGCCTTGAAGAAGTGAT                       |
| OsGLP8-2OE-F  | GTGTTACTTCTGCAGGGTACCATGGCTTCACCATCTTCCTTCT |
| OsGLP8-2OE-R  | ATAACGCGTACTAGTAAGCTTTTAGTAGTGGTTGTTCTCCCAA |

**TABLE S2** | Primers used for quantitative real-time PCR analysis.

| Primer name       | Primer sequence (5'-3')  |
|-------------------|--------------------------|
| <i>ACTIN1-F</i>   | TATGCTCTCCCCCATGCTATC    |
| <i>ACTIN1-R</i>   | CCGTTGTGGTGAATGAGTAACC   |
| <i>OsGLP8-2F</i>  | AGGCAGCCATGCTCGATAAG     |
| <i>OsGLP8-2R</i>  | GGGTGCAAAGTCAAGACGTG     |
| <i>OsGLP8-3F</i>  | TGTGCATCCTCGTGCTACTG     |
| <i>OsGLP8-3R</i>  | ACCCTTATGCACCACCTTGG     |
| <i>OsGLP8-5F</i>  | ACCTGTGCGTGTCAATGGAT     |
| <i>OsGLP8-5R</i>  | ACGTTGGACCCAACCTTGTT     |
| <i>OsGLP8-7F</i>  | GGCTTCACCATCTTCCTTCTGC   |
| <i>OsGLP8-7R</i>  | TGAGTGCTTATCGGCAACGC     |
| <i>OsGLP8-11F</i> | ACTCACCTGCAGTGCTTGTC     |
| <i>OsGLP8-11R</i> | TGTTTCGTCTTCCGAGGAGTG    |
| <i>PAL-F</i>      | ACACAACCTCCTCCACCTCCATCG |
| <i>PAL-R</i>      | GCTCCTCCGCCGCCTTCC       |
| <i>C4H-F</i>      | GCACGCCATACTACACCAGAC    |
| <i>C4H-R</i>      | GTCGTCGTTGCCGCTCATC      |
| <i>4CL-F</i>      | CGACCGCCACGACCTCTC       |
| <i>4CL-R</i>      | GCCCTGCCTCCGTCATCC       |
| <i>CCoAoMT-F</i>  | CACCAACAAGACGCTGCTCAAG   |
| <i>CCoAoMT-R</i>  | CTCATCCGCCGACGACTGC      |
